# Supplementary material for: Comparative Mitogenomics of Two Sympatric Catfishes of Exostoma (Siluriformes: Sisoridae) from the Lower Yarlung Tsangpo River and Its Application for Phylogenetic Consideration
Source: MDPI journal article supplement (doi:10.3390/genes13091615), 2022-09-08
Supplement: s1 [file s1]

**Table S1.** Gene or element features of the mitochondrial genomes of *Exostoma tibetanium* and *Exostoma tenuicaudatum*.

| Gene                        | Strand | Location    |             | Size (bp) |      | Start codon |     | Stop codon |     | Anticodon |     | IGN |     |
|-----------------------------|--------|-------------|-------------|-----------|------|-------------|-----|------------|-----|-----------|-----|-----|-----|
|                             |        | ti          | te          | ti        | te   | ti          | te  | ti         | te  | ti        | te  | ti  | te  |
| <i>tRNA-Phe</i>             | +      | 1–69        | 1–69        | 69        | 69   |             |     |            |     | GAA       | GAA |     |     |
| <i>12SrRNA</i>              | +      | 71–1024     | 71–1025     | 954       | 955  |             |     |            |     |           |     | 1   | 1   |
| <i>tRNA-Val</i>             | +      | 1025–1096   | 1026–1097   | 72        | 72   |             |     |            |     | TAC       | TAC | 0   | 0   |
| <i>16SrRNA</i>              | +      | 1118–2768   | 1119–2770   | 1651      | 1652 |             |     |            |     |           |     | 21  | 21  |
| <i>tRNA-Leu<sup>1</sup></i> | +      | 2767–2841   | 2769–2843   | 75        | 75   |             |     |            |     | TAA       | TAA | –2  | –2  |
| <i>ND1</i>                  | +      | 2844–3815   | 2847–3818   | 972       | 972  | ATG         | ATG | TAA        | TAA |           |     | 2   | 3   |
| <i>tRNA-Ile</i>             | +      | 3821–3892   | 3824–3895   | 72        | 72   |             |     |            |     | GAT       | GAT | 5   | 5   |
| <i>tRNA-Gln</i>             | –      | 3892–3962   | 3895–3965   | 71        | 71   |             |     |            |     | TTG       | TTG | –1  | –1  |
| <i>tRNA-Met</i>             | +      | 3962–4032   | 3965–4035   | 71        | 71   |             |     |            |     | CAT       | CAT | –1  | –1  |
| <i>ND2</i>                  | +      | 4033–5079   | 4039–5085   | 1047      | 1047 | ATG         | ATG | TAG        | TAG |           |     | 0   | 3   |
| <i>tRNA-Trp</i>             | +      | 5080–5151   | 5086–5155   | 72        | 70   |             |     |            |     | TCA       | TCA | 0   | 0   |
| <i>tRNA-Ala</i>             | –      | 5154–5222   | 5158–5226   | 69        | 69   |             |     |            |     | TGC       | TGC | 2   | 2   |
| <i>tRNA-Asn</i>             | –      | 5224–5296   | 5228–5300   | 73        | 73   |             |     |            |     | GTT       | GTT | 1   | 1   |
| <i>OL</i>                   | –      | 5299–5328   | 5303–5332   | 30        | 30   |             |     |            |     |           |     | 2   | 2   |
| <i>tRNA-Cys</i>             | –      | 5329–5394   | 5333–5398   | 67        | 67   |             |     |            |     | GCA       | GCA | 0   | 0   |
| <i>tRNA-Tyr</i>             | –      | 5395–5465   | 5399–5469   | 71        | 71   |             |     |            |     | GTA       | GTA | 0   | 0   |
| <i>COX1</i>                 | +      | 5467–7017   | 5471–7021   | 1551      | 1551 | GTG         | GTG | TAA        | TAA |           |     | 1   | 1   |
| <i>tRNA-Ser<sup>1</sup></i> | –      | 7018–7088   | 7022–7092   | 71        | 71   |             |     |            |     | TGA       | TGA | 0   | 0   |
| <i>tRNA-Asp</i>             | +      | 7093–7162   | 7097–7166   | 70        | 70   |             |     |            |     | GTC       | GTC | 4   | 4   |
| <i>COX2</i>                 | +      | 7177–7867   | 7181–7871   | 691       | 691  | ATG         | ATG | T          | T   |           |     | 14  | 14  |
| <i>tRNA-Lys</i>             | +      | 7868–7942   | 7872–7946   | 75        | 75   |             |     |            |     | TTT       | TTT | 0   | 0   |
| <i>ATP8</i>                 | +      | 7943–8110   | 7948–8115   | 168       | 168  | ATG         | ATG | TAA        | TAA |           |     | 0   | 1   |
| <i>ATP6</i>                 | +      | 8101–8784   | 8106–8789   | 684       | 684  | ATG         | ATG | TAA        | TAA |           |     | –10 | –10 |
| <i>COX3</i>                 | +      | 8784–9568   | 8789–9573   | 785       | 785  | ATG         | ATG | TA         | TA  |           |     | –1  | –1  |
| <i>tRNA-Gly</i>             | +      | 9569–9635   | 9574–9642   | 67        | 69   |             |     |            |     | TCC       | TCC | 0   | 0   |
| <i>ND3</i>                  | +      | 9636–9986   | 9643–9993   | 351       | 351  | ATG         | ATG | TAG        | TAG |           |     | 0   | 0   |
| <i>tRNA-Arg</i>             | +      | 9987–10056  | 9994–10062  | 70        | 69   |             |     |            |     | TCG       | TCG | 0   | 0   |
| <i>ND4L</i>                 | +      | 10057–10353 | 10063–10359 | 297       | 297  | ATG         | ATG | TAA        | TAA |           |     | 0   | 0   |
| <i>ND4</i>                  | +      | 10347–11727 | 10353–11733 | 1381      | 1381 | ATG         | ATG | T          | T   |           |     | –7  | –7  |
| <i>tRNA-His</i>             | +      | 11728–11797 | 11734–11803 | 70        | 70   |             |     |            |     | GTG       | GTG | 0   | 0   |
| <i>tRNA-Ser<sup>2</sup></i> | +      | 11798–11864 | 11804–11870 | 67        | 67   |             |     |            |     | GCT       | GCT | 0   | 0   |
| <i>tRNA-Leu<sup>2</sup></i> | +      | 11871–11942 | 11875–11946 | 72        | 72   |             |     |            |     | TAG       | TAG | 6   | 4   |
| <i>ND5</i>                  | +      | 11943–13769 | 11947–13773 | 1827      | 1827 | ATG         | ATG | TAA        | TAA |           |     | 0   | 0   |
| <i>ND6</i>                  | –      | 13765–14283 | 13770–14288 | 519       | 519  | ATG         | ATG | AGA        | TAA |           |     | –5  | –1  |
| <i>tRNA-Glu</i>             | –      | 14284–14352 | 14289–14357 | 69        | 69   |             |     |            |     | TTC       | TTC | –3  | 0   |
| <i>CYTb</i>                 | +      | 14355–15492 | 14360–15497 | 1138      | 1138 | ATG         | ATG | T          | T   |           |     | 2   | 2   |
| <i>tRNA-Thr</i>             | +      | 15493–15564 | 15498–15569 | 72        | 72   |             |     |            |     | TGT       | TGT | 0   | 0   |
| <i>tRNA-Pro</i>             | –      | 15563–15632 | 15568–15637 | 70        | 70   |             |     |            |     | TGG       | TGG | –2  | –2  |
| <i>D-loop</i>               | +      | 15633–16528 | 15638–16533 | 896       | 896  |             |     |            |     |           |     | 0   | 0   |

ti representing *E. tibetanium*; te representing *E. tenuicaudatum*.

**Table S2.** The codon counts and relative synonymous codon usages (RSCU) in the mitochondrial protein-coding genes of *Exostoma tibetanum* and *Exostoma tenuicaudatum*.

| Amino acid              | Codon | <i>E. tibetanum</i> |      | <i>E. tenuicaudatum</i> |      |
|-------------------------|-------|---------------------|------|-------------------------|------|
|                         |       | Count               | RSCU | Count                   | RSCU |
| <i>Phe</i>              | UUU   | 81                  | 0.75 | 92                      | 0.85 |
|                         | UUC   | 134                 | 1.25 | 125                     | 1.15 |
| <i>Leu</i> <sup>1</sup> | UUA   | 98                  | 0.92 | 83                      | 0.78 |
|                         | UUG   | 20                  | 0.19 | 24                      | 0.23 |
| <i>Leu</i> <sup>2</sup> | CUU   | 64                  | 0.6  | 59                      | 0.56 |
|                         | CUC   | 92                  | 0.86 | 98                      | 0.92 |
|                         | CUA   | 316                 | 2.96 | 314                     | 2.96 |
|                         | CUG   | 51                  | 0.48 | 58                      | 0.55 |
| <i>Ile</i>              | AUU   | 131                 | 0.93 | 133                     | 0.92 |
|                         | AUC   | 150                 | 1.07 | 156                     | 1.08 |
| <i>Met</i>              | AUA   | 139                 | 1.54 | 128                     | 1.44 |
|                         | AUG   | 42                  | 0.46 | 50                      | 0.56 |
| <i>Val</i>              | GUU   | 48                  | 0.96 | 46                      | 0.92 |
|                         | GUC   | 45                  | 0.9  | 43                      | 0.86 |
|                         | GUA   | 78                  | 1.55 | 86                      | 1.73 |
|                         | GUG   | 30                  | 0.6  | 24                      | 0.48 |
| <i>Ser</i> <sup>1</sup> | UCU   | 33                  | 0.86 | 35                      | 0.98 |
|                         | UCC   | 69                  | 1.81 | 68                      | 1.9  |
|                         | UCA   | 73                  | 1.91 | 71                      | 1.98 |
|                         | UCG   | 5                   | 0.13 | 2                       | 0.06 |
| <i>Pro</i>              | CCU   | 25                  | 0.46 | 21                      | 0.39 |
|                         | CCC   | 105                 | 1.94 | 100                     | 1.84 |
|                         | CCA   | 72                  | 1.33 | 85                      | 1.57 |
|                         | CCG   | 14                  | 0.26 | 11                      | 0.2  |
| <i>Thr</i>              | ACU   | 42                  | 0.5  | 39                      | 0.45 |
|                         | ACC   | 130                 | 1.56 | 147                     | 1.7  |
|                         | ACA   | 145                 | 1.74 | 147                     | 1.7  |
|                         | ACG   | 16                  | 0.19 | 13                      | 0.15 |
| <i>Ala</i>              | GCU   | 37                  | 0.44 | 45                      | 0.55 |
|                         | GCC   | 174                 | 2.07 | 151                     | 1.85 |
|                         | GCA   | 112                 | 1.33 | 119                     | 1.46 |
|                         | GCG   | 14                  | 0.17 | 11                      | 0.13 |
| <i>Tyr</i>              | UAU   | 41                  | 0.75 | 44                      | 0.8  |
|                         | UAC   | 68                  | 1.25 | 66                      | 1.2  |
| <i>His</i>              | CAU   | 26                  | 0.47 | 22                      | 0.4  |
|                         | CAC   | 85                  | 1.53 | 89                      | 1.6  |
| <i>Gln</i>              | CAA   | 88                  | 1.71 | 94                      | 1.83 |
|                         | CAG   | 15                  | 0.29 | 9                       | 0.17 |
| <i>Asn</i>              | AAU   | 29                  | 0.48 | 39                      | 0.6  |
|                         | AAC   | 93                  | 1.52 | 92                      | 1.4  |
| <i>Lys</i>              | AAA   | 77                  | 1.86 | 76                      | 1.83 |
|                         | AAG   | 6                   | 0.14 | 7                       | 0.17 |
| <i>Asp</i>              | GAU   | 18                  | 0.53 | 17                      | 0.47 |
|                         | GAC   | 50                  | 1.47 | 55                      | 1.53 |
| <i>Glu</i>              | GAA   | 85                  | 1.67 | 85                      | 1.72 |
|                         | GAG   | 17                  | 0.33 | 14                      | 0.28 |

|                        |     |    |      |     |      |
|------------------------|-----|----|------|-----|------|
| <i>Cys</i>             | UGU | 11 | 0.73 | 6   | 0.43 |
|                        | UGC | 19 | 1.27 | 22  | 1.57 |
| <i>Trp</i>             | UGA | 92 | 1.53 | 98  | 1.62 |
|                        | UGG | 28 | 0.47 | 23  | 0.38 |
| <i>Arg</i>             | CGU | 3  | 0.17 | 7   | 0.39 |
|                        | CGC | 8  | 0.44 | 4   | 0.22 |
|                        | CGA | 53 | 2.94 | 53  | 2.94 |
|                        | CGG | 8  | 0.44 | 8   | 0.44 |
| <i>Ser<sup>2</sup></i> | AGU | 4  | 0.1  | 3   | 0.08 |
|                        | AGC | 45 | 1.18 | 36  | 1    |
| <i>Gly</i>             | GGU | 24 | 0.41 | 23  | 0.39 |
|                        | GGC | 76 | 1.29 | 71  | 1.2  |
|                        | GGA | 98 | 1.66 | 102 | 1.72 |
|                        | GGG | 38 | 0.64 | 41  | 0.69 |

**Table S3.** The differences of phylogenetic topologies inferred from concatenated protein-coding genes and single protein-coding gene for glyptosternine catfishes via Shimodaira–Hasegawa test.

| Gene        | Size (bp) | ln <i>L</i> | Diff ln <i>L</i> | <i>P</i> -value |
|-------------|-----------|-------------|------------------|-----------------|
| 13PCGs      | 11379     | −99899.8    | 0                | 0.9638          |
| <i>ND1</i>  | 972       | −119706     | 19806.228        | 0.0000          |
| <i>ND2</i>  | 1044      | −103874.9   | 3975.136         | 0.0000          |
| <i>COX1</i> | 1545      | −117950.4   | 18050.58         | 0.0000          |
| <i>COX2</i> | 690       | −106545     | 6645.191         | 0.0000          |
| <i>ATP8</i> | 165       | −126735.7   | 26835.891        | 0.0000          |
| <i>ATP6</i> | 681       | −106094.6   | 6194.823         | 0.0000          |
| <i>COX3</i> | 783       | −109676.5   | 9776.72          | 0.0000          |
| <i>ND3</i>  | 348       | −108157.9   | 8258.074         | 0.0000          |
| <i>ND4L</i> | 294       | −116608.9   | 16709.058        | 0.0000          |
| <i>ND4</i>  | 1380      | −124910.1   | 25010.258        | 0.0000          |
| <i>ND5</i>  | 1824      | −123050.7   | 23150.907        | 0.0000          |
| <i>ND6</i>  | 516       | −123570.9   | 23671.09         | 0.0000          |
| <i>CYTB</i> | 1137      | −123448.8   | 23549.033        | 0.0000          |

**Table S4.** Estimation of dN, dS, and  $\omega$  values for protein-coding genes of three *Exostoma* species.

| genes       | <i>Exostoma tibetanum</i> |        |          | <i>Exostoma tenuicaudatum</i> |        |          | <i>Exostoma gaoligongense</i> |        |          |
|-------------|---------------------------|--------|----------|-------------------------------|--------|----------|-------------------------------|--------|----------|
|             | dN                        | dS     | $\omega$ | dN                            | dS     | $\omega$ | dN                            | dS     | $\omega$ |
| <i>ND1</i>  | 0.0073                    | 0.1699 | 0.0428   | 0.0148                        | 0.2955 | 0.0500   | 0.0121                        | 0.2630 | 0.0458   |
| <i>ND2</i>  | 0.0255                    | 0.2703 | 0.0944   | 0.0182                        | 0.2618 | 0.0696   | 0.0252                        | 0.2508 | 0.1004   |
| <i>COX1</i> | 0.0000                    | 0.0000 | 0.0384   | 0.0000                        | 0.0000 | 0.0607   | 0.0027                        | 0.2317 | 0.0118   |
| <i>COX2</i> | 0.0000                    | 0.1621 | 0.0001   | 0.0000                        | 0.1660 | 0.0001   | 0.0041                        | 0.2689 | 0.0151   |
| <i>ATP8</i> | 0.0238                    | 0.1760 | 0.1350   | 0.0262                        | 0.1736 | 0.1510   | 0.0711                        | 0.1248 | 0.5699   |
| <i>ATP6</i> | 0.0172                    | 0.1475 | 0.1164   | 0.0124                        | 0.2307 | 0.0538   | 0.0378                        | 0.2303 | 0.1640   |
| <i>COX3</i> | 0.0062                    | 0.1504 | 0.0409   | 0.0095                        | 0.1401 | 0.0677   | 0.0135                        | 0.4521 | 0.0299   |
| <i>ND3</i>  | 0.0352                    | 0.2381 | 0.1480   | 0.0188                        | 0.4230 | 0.0445   | 0.0353                        | 0.5198 | 0.0678   |
| <i>ND4L</i> | 0.0169                    | 0.0553 | 0.3046   | 0.0107                        | 0.1357 | 0.0791   | 0.0206                        | 0.2587 | 0.0795   |
| <i>ND4</i>  | 0.0132                    | 0.3067 | 0.0430   | 0.0102                        | 0.3062 | 0.0333   | 0.0101                        | 0.2691 | 0.0374   |
| <i>ND5</i>  | 0.0195                    | 0.2450 | 0.0797   | 0.0239                        | 0.2078 | 0.1149   | 0.0286                        | 0.2128 | 0.1343   |
| <i>ND6</i>  | 0.0165                    | 0.2015 | 0.0819   | 0.0227                        | 0.2141 | 0.1059   | 0.0371                        | 0.2341 | 0.1587   |
| <i>CYTB</i> | 0.0156                    | 0.1519 | 0.1027   | 0.0119                        | 0.3581 | 0.0333   | 0.0220                        | 0.3373 | 0.0653   |
| 13 PCGs     | 0.0132                    | 0.1505 | 0.0880   | 0.0128                        | 0.1761 | 0.0726   | 0.0189                        | 0.2406 | 0.0784   |
